# Supplementary material
Source: PubMed Central journal article supplement (PMC2807404)
Supplement: NIHMS117700-supplement-supTable.pdf [file NIHMS117700-supplement-supTable.pdf]

Supplementary Table I

| Gi number | Protein name                                                                                                                                                    | CON | RA | RA+LY | BMP+LIF | FORSK |
|-----------|-----------------------------------------------------------------------------------------------------------------------------------------------------------------|-----|----|-------|---------|-------|
| 4948      | beta tubulin                                                                                                                                                    | -   | +  | +     | +       | +     |
| 50797     | unnamed protein product [Mus musculus]                                                                                                                          | +   | -  | -     | -       | -     |
| 51304     | unnamed protein product [Mus musculus]                                                                                                                          | -   | -  | -     | -       | +     |
| 51311     | unnamed protein product [Mus musculus]                                                                                                                          | -   | -  | -     | +       | -     |
| 51339     | high mobility group 2 protein [Mus musculus]                                                                                                                    | -   | -  | +     | +       | +     |
| 52785     | unnamed protein product [Mus musculus]                                                                                                                          | -   | -  | -     | +       | -     |
| 53165     | modifier 2 [Mus musculus]                                                                                                                                       | -   | -  | -     | -       | +     |
| 54912     | unnamed protein product [Mus musculus]                                                                                                                          | -   | -  | -     | +       | +     |
| 55291     | unnamed protein product [Mus musculus]                                                                                                                          | -   | -  | -     | +       | -     |
| 55451     | Y box-binding protein [Mus musculus]                                                                                                                            | -   | -  | +     | -       | -     |
| 56621     | unnamed protein product [Rattus norvegicus]                                                                                                                     | -   | -  | -     | -       | +     |
| 57406     | unnamed protein product [Rattus norvegicus]                                                                                                                     | -   | -  | -     | +       | +     |
| 57708     | unnamed protein product [Rattus rattus]                                                                                                                         | -   | -  | -     | +       | -     |
| 90217     | tubulin alpha                                                                                                                                                   | +   | +  | +     | +       | +     |
| 90659     | hypothetical protein A - mouse (fragment)                                                                                                                       | -   | -  | +     | -       | -     |
| 92355     | dnaK-type molecular chaperone hst70 - rat                                                                                                                       | -   | -  | -     | +       | -     |
| 92559     | nucleolin - rat                                                                                                                                                 | +   | +  | +     | +       | -     |
| 109866    | gene DN38 protein - mouse (fragment)                                                                                                                            | -   | -  | +     | -       | +     |
| 110998    | splicing factor U2AF homolog - mouse                                                                                                                            | -   | -  | -     | +       | -     |
| 112077    | nucleolar phosphoprotein B23.1 - rat                                                                                                                            | -   | -  | -     | +       | -     |
| 115720    | Cathepsin D precursor [Contains: Cathepsin D 12 kDa light chain; Cathepsin D 9 kDa light chain; Cathepsin D 34 kDa heavy chain; Cathepsin D 30 kDa heavy chain] | -   | -  | -     | +       | -     |
| 119168    | Elongation factor 2 (EF-2)                                                                                                                                      | -   | -  | +     | -       | +     |
| 119361    | Endoplasmic (Heat shock protein 90 kDa beta member 1) (94 kDa glucose-regulated protein) (GRP94)                                                                | -   | -  | +     | -       | -     |
| 119531    | Protein disulfide-isomerase A4 precursor (Protein ERp-72) (ERp72)                                                                                               | -   | -  | -     | +       | -     |
| 121570    | 78 kDa glucose-regulated protein precursor (GRP 78) (Heat shock 70 kDa protein 5) (Immunoglobulin h                                                             | -   | -  | +     | -       | +     |
| 123647    | Heat shock cognate 71 kDa protein (Heat shock 70 kDa protein 8)                                                                                                 | -   | +  | +     | +       | -     |
| 123681    | Heat shock protein HSP 90-beta (HSP 84) (Tumor-specific transplantation 84 kDa antigen) (TSTA)                                                                  | -   | +  | +     | +       | +     |
| 125970    | 40S ribosomal protein SA (p40) (34/67 kDa laminin receptor)                                                                                                     | -   | -  | +     | -       | -     |

|        |                                                                                                                            |   |   |   |   |   |
|--------|----------------------------------------------------------------------------------------------------------------------------|---|---|---|---|---|
| 126741 | Microtubule-associated protein 2 (MAP 2)                                                                                   | - | - | - | + | - |
| 129731 | Protein disulfide-isomerase precursor (PDI) (Prolyl 4-hydroxylase subunit beta) (Cellular thyroid hormone-binding protein) | - | - | - | + | + |
| 133262 | Heterogeneous nuclear ribonucleoprotein C (hnRNP C) (hnRNP core protein C)                                                 | - | + | - | - | - |
| 194033 | heat-shock protein hsp86                                                                                                   | - | + | + | + | + |
| 199765 | moesin                                                                                                                     | - | - | - | + | + |
| 201115 | tau microtubule binding protein                                                                                            | - | - | - | + | - |
| 202868 | AMPA selective glutamate receptor                                                                                          | - | - | - | + | - |
| 203474 | creatine kinase                                                                                                            | - | - | + | + | - |
| 203493 | 2',3'-cyclic nucleotide 3-phosphodiesterase [Rattus norvegicus]                                                            | - | - | + | - | - |
| 204595 | histone (H1d)                                                                                                              | - | - | - | + | - |
| 206033 | parathymosin                                                                                                               | - | - | - | - | + |
| 223096 | histone H2B                                                                                                                | - | - | - | + | - |
| 227256 | talin                                                                                                                      | - | - | - | + | - |
| 256545 | ribosomal protein P2=iron-binding protein [rats, liver, Peptide Partial, 13 aa, segment 2 of 4]                            | - | - | - | + | - |
| 266495 | Myristoylated alanine-rich C-kinase substrate (MARCKS) (Protein kinase C substrate 80 kDa protein)                         | - | - | + | + | + |
| 285140 | proteasome endopeptidase complex (EC 3.4.25.1) delta chain - rat                                                           | - | - | - | + | - |
| 293675 | IFN-response element binding factor 2                                                                                      | - | - | - | + | - |
| 294543 | dynein heavy chain                                                                                                         | + | + | - | + | + |
| 300525 | mobilferrin=iron-binding protein {N-terminal} [rats, duodenal mucosa, Peptide Partial, 17 aa]                              | - | - | - | + | + |
| 310174 | cyclase-associated protein                                                                                                 | - | - | - | + | - |
| 387090 | alpha-cardiac actin                                                                                                        | - | - | + | - | - |
| 405112 | activator 1 large subunit [Mus musculus]                                                                                   | - | + | - | - | - |
| 423647 | protein disulfide-isomerase (EC 5.3.4.1) ERp72 precursor - rat                                                             | - | - | - | + | - |
| 439821 | cortactin, p80/p85 [mice, BALB/c 3T3 cells, Peptide, 546 aa]                                                               | - | - | - | + | - |
| 468371 | apurinic/apurimidinic endonuclease                                                                                         | - | - | + | - | - |
| 473912 | phosphoprotein                                                                                                             | + | + | + | - | + |
| 484530 | H3.3 like histone MH921 - mouse                                                                                            | - | - | - | + | - |
| 487851 | dynamamin                                                                                                                  | - | - | - | - | + |
| 488838 | CaBP1 [Rattus norvegicus]                                                                                                  | - | - | - | + | + |
| 508270 | A+U-rich RNA-binding protein                                                                                               | - | - | - | + | + |
| 525272 | MAP2d [Rattus norvegicus]                                                                                                  | - | - | - | + | - |

|         |                                                                                                                                                  |   |   |   |   |   |
|---------|--------------------------------------------------------------------------------------------------------------------------------------------------|---|---|---|---|---|
| 544053  | Complement C3 precursor                                                                                                                          | - | - | - | + | - |
| 553907  | elongation factor Tu                                                                                                                             | - | - | - | + | - |
| 585364  | Kinesin light chain 1 (KLC 1)                                                                                                                    | - | - | - | + | - |
| 600761  | high mobility group 1 protein                                                                                                                    | - | - | - | + | + |
| 673454  | spermatid perinuclear RNA binding protein [Mus musculus]                                                                                         | - | - | - | + | - |
| 765348  | antigen LEC-A [Mus sp.]                                                                                                                          | - | - | - | + | - |
| 945419  | hepatoma derived growth factor [Mus musculus]                                                                                                    | - | - | - | + | + |
| 1050930 | polyubiquitin [Rattus norvegicus]                                                                                                                | - | - | - | - | + |
| 1051270 | 14-3-3 zeta isoform                                                                                                                              | - | + | - | + | - |
| 1083269 | CW17R protein - mouse                                                                                                                            | - | - | - | + | - |
| 1083569 | kappa-B motif-binding phosphoprotein - mouse                                                                                                     | - | - | - | + | - |
| 1095318 | SAP97 protein                                                                                                                                    | - | - | + | - | - |
| 1103590 | NAD-dependent glyceraldehyde 3-phosphate dehydrogenase (phosphorylating) [Jaculus orientalis]                                                    | - | - | - | + | - |
| 1136586 | PDGF associated protein                                                                                                                          | - | - | - | - | + |
| 1154620 | growth-arrest-specific protein 8 [Mus musculus]                                                                                                  | - | - | - | + | - |
| 1165123 | component C5 of proteasome [Mus musculus]                                                                                                        | - | - | - | + | + |
| 1170155 | Histone H1.3 (H1 VAR.4) (H1d)                                                                                                                    | - | - | - | - | + |
| 1304157 | 78 kDa glucose-regulated protein [Mus musculus]                                                                                                  | - | - | + | - | - |
| 1346784 | Proteasome subunit alpha type 7 (Proteasome subunit RC6-1)                                                                                       | - | - | - | + | - |
| 1407663 | SH3P2                                                                                                                                            | - | - | - | - | + |
| 1435195 | centaurin alpha                                                                                                                                  | - | - | - | + | - |
| 1523982 | BRCA2 [Cricetulus griseus]                                                                                                                       | - | - | - | - | + |
| 1585294 | RNH-1/14-3-3 protein                                                                                                                             | - | - | + | - | - |
| 1698574 | Ki antigen                                                                                                                                       | - | - | - | + | - |
| 1711240 | TIS [Mus musculus]                                                                                                                               | - | - | - | + | - |
| 1763275 | acidic nuclear phosphoprotein pp32 [Mus musculus]                                                                                                | - | - | + | + | + |
| 1915913 | Ulip2 protein [Mus musculus]                                                                                                                     | - | - | + | + | + |
| 1915915 | Ulip3 protein [Mus musculus]                                                                                                                     | - | - | - | + | - |
| 1934963 | cytoskeletal protein [Mus musculus]                                                                                                              | - | - | - | + | - |
| 2318133 | beta actin [Cricetinae gen. sp.]                                                                                                                 | - | - | - | + | - |
| 2326168 | type VII collagen [Mus musculus]                                                                                                                 | + | - | - | - | - |
| 2330657 | glycoprotein gC1qBP [Rattus norvegicus]                                                                                                          | - | - | - | + | + |
| 2494892 | Histone-binding protein RBBP7 (Retinoblastoma-binding protein 7) (RBBP-7) (Retinoblastoma-binding protein p46) (Histone acetyltransferase type B | - | - | - | + | - |

|         |                                                                                                                                                                                                |   |   |   |   |   |
|---------|------------------------------------------------------------------------------------------------------------------------------------------------------------------------------------------------|---|---|---|---|---|
|         | subunit 2) (Nucleosome remodeling factor subunit RBAP46)                                                                                                                                       |   |   |   |   |   |
| 2494988 | Neurotensin receptor type 2 (NT-R-2) (Low-affinity levocabastine-sensitive neurotensin receptor) (N)                                                                                           | - | + | - | - | - |
| 2506246 | Spectrin beta chain, erythrocyte (Beta-I spectrin)                                                                                                                                             | - | - | + | - | - |
| 2598562 | BiP [Mus musculus]                                                                                                                                                                             | - | - | - | + | - |
| 2645205 | p160 myb-binding protein [Mus musculus]                                                                                                                                                        | - | - | - | + | - |
| 2996046 | cortactin isoform B [Rattus norvegicus]                                                                                                                                                        | - | - | - | + | - |
| 3024753 | DNA topoisomerase 2-beta (DNA topoisomerase II, beta isozyme)                                                                                                                                  | - | - | + | - | - |
| 3065929 | 14-3-3 protein gamma [Mus musculus]                                                                                                                                                            | - | - | + | + | - |
| 3132829 | nuclear RNA helicase [Rattus norvegicus]                                                                                                                                                       | - | - | - | + | - |
| 3192363 | drebrin E [Rattus norvegicus]                                                                                                                                                                  | - | - | - | + | - |
| 3241856 | DNA-dependent protein kinase catalytic subunit [Mus musculus]                                                                                                                                  | - | + | - | - | - |
| 3282833 | doublecortin [Mus musculus]                                                                                                                                                                    | - | - | - | + | - |
| 3287265 | E-STOP protein [Rattus norvegicus]                                                                                                                                                             | - | - | + | - | - |
| 3329498 | heterogenous nuclear ribonucleoprotein A2/B1 [Mus musculus]                                                                                                                                    | - | + | + | - | - |
| 3377279 | AIF-C1 [Rattus norvegicus]                                                                                                                                                                     | - | + | + | + | + |
| 3834675 | interleukin enhancer binding factor 3 [Mus musculus]                                                                                                                                           | - | - | + | + | - |
| 3914434 | Proteasome subunit beta type 5 precursor (Proteasome epsilon chain) (Macropain epsilon chain) (Multicatalytic endopeptidase complex epsilon chain) (Proteasome subunit X) (Proteasome chain 6) | - | - | - | + | - |
| 3914438 | Proteasome subunit alpha type 3 (Proteasome component C8) (Macropain subunit C8) (Multicatalytic endopeptidase complex subunit C8) (Proteasome subunit K)                                      | - | - | - | + | + |
| 3915806 | Proteasome subunit beta type 4 precursor (Proteasome beta chain) (Macropain beta chain) (Multicatalytic endopeptidase complex beta chain) (Proteasome chain 3) (RN3)                           | - | - | - | - | + |
| 3953617 | SET [Mus musculus]                                                                                                                                                                             | - | - | + | + | + |
| 4176396 | alternative splicing:see accession between AB000494 and AB000504; mKQT2.2 [Mus musculus]                                                                                                       | - | - | - | + | - |
| 4454561 | mahogany protein; MG [Mus musculus]                                                                                                                                                            | - | - | - | - | + |
| 4505087 | mago-nashi homolog [Homo sapiens]                                                                                                                                                              | - | - | - | + | - |
| 4505705 | phosphoprotein enriched in astrocytes 15 [Homo sapiens]                                                                                                                                        | - | - | - | + | - |
| 4558873 | testis-enriched protein tyrosine phosphatase [Mus musculus]                                                                                                                                    | - | + | - | - | - |
| 4759160 | small nuclear ribonucleoprotein polypeptide D3 [Homo sapiens]                                                                                                                                  | - | - | - | + | - |
| 4826972 | RNA binding motif protein 8A [Homo sapiens]                                                                                                                                                    | - | - | - | - | + |
| 4838513 | foocen-m2 [Rattus norvegicus]                                                                                                                                                                  | - | - | - | + | - |
| 5030428 | glial fibrillary acidic protein delta [Rattus norvegicus]                                                                                                                                      | - | - | - | + | - |

|         |                                                                                                               |   |   |   |   |   |
|---------|---------------------------------------------------------------------------------------------------------------|---|---|---|---|---|
| 5081800 | telomerase binding protein p23 [Mus musculus]                                                                 | - | - | - | + | + |
| 5106715 | immunoglobulin heavy chain variable region [Mus musculus]                                                     | - | - | - | + | - |
| 5733095 | tyrosine kinase TYK2 [Mus musculus]                                                                           | - | + | - | - | - |
| 5803076 | chromobox homolog 1 (HP1 beta homolog Drosophila) [Homo sapiens]                                              | - | - | - | - | + |
| 5803225 | 14-3-3 epsilon, tyrosine 3/tryptophan 5 -monooxygenase activation protein, epsilon polypeptide [Homo sapiens] | + | - | + | + | + |
| 5902076 | splicing factor, arginine/serine-rich 1 isoform 1 [Homo sapiens]                                              | - | - | - | + | - |
| 5902102 | small nuclear ribonucleoprotein D1 polypeptide 16kDa [Homo sapiens]                                           | - | - | - | + | - |
| 5902663 | elongation factor 1-beta homolog [Mus musculus]                                                               | - | - | - | - | + |
| 6005942 | valosin-containing protein [Homo sapiens]                                                                     | - | - | + | - | - |
| 6090911 | septin-like protein SLP-b [Rattus norvegicus]                                                                 | - | - | - | + | - |
| 6164831 | Robo2 [Rattus norvegicus]                                                                                     | - | - | - | + | - |
| 6650640 | nuclear factor I-A2 [Rattus norvegicus]                                                                       | - | - | - | + | - |
| 6677699 | radixin [Mus musculus]                                                                                        | - | - | - | - | + |
| 6677775 | ribosomal protein L22 [Mus musculus]                                                                          | - | - | - | + | - |
| 6678483 | ubiquitin-activating enzyme E1, Chr X [Mus musculus]                                                          | - | - | + | - | - |
| 6679012 | nucleosome assembly protein 1-like 4 [Mus musculus]                                                           | - | - | - | - | + |
| 6679465 | protein kinase C substrate 80K-H [Mus musculus]                                                               | - | - | - | - | + |
| 6679935 | growth associated protein 43 [Mus musculus]                                                                   | - | - | + | - | - |
| 6680740 | ataxia telangiectasia mutated homolog [Mus musculus]                                                          | - | - | - | + | - |
| 6680836 | calreticulin [Mus musculus]                                                                                   | - | - | + | - | - |
| 6681209 | DNA methyltransferase 3A isoform 1 [Mus musculus]                                                             | - | - | - | + | - |
| 6681219 | dihydropyrimidinase-like 3 [Mus musculus]                                                                     | - | - | - | + | - |
| 6753178 | barrier to autointegration factor 1 [Mus musculus]                                                            | - | - | - | - | + |
| 6753590 | cytochrome P450, family 46, subfamily a, polypeptide 1 [Mus musculus]                                         | - | - | - | - | + |
| 6754254 | heat shock protein 1, alpha [Mus musculus]                                                                    | - | - | + | - | + |
| 6754706 | MARCKS-like protein [Mus musculus]                                                                            | - | - | + | + | + |
| 6755032 | period homolog 1 [Mus musculus]                                                                               | - | - | - | - | + |
| 6755196 | proteasome (prosome, macropain) subunit, alpha type 4 [Mus musculus]                                          | - | - | - | + | - |
| 6755198 | proteasome (prosome, macropain) subunit, alpha type 6 [Mus musculus]                                          | - | - | - | + | - |
| 6755206 | proteasome (prosome, macropain) subunit, beta type 7 [Mus musculus]                                           | - | - | - | + | - |
| 6755478 | splicing factor, arginine/serine-rich 2 [Mus musculus]                                                        | - | - | + | - | - |
| 6755594 | elongation factor Tu GTP binding domain containing 2 [Mus musculus]                                           | - | - | + | - | - |
| 6755616 | sperm associated antigen 1 [Mus musculus]                                                                     | - | - | + | - | - |
| 6755863 | tumor rejection antigen gp96 [Mus musculus]                                                                   | + | + | + | + | + |

|         |                                                                                                                   |   |   |   |   |   |
|---------|-------------------------------------------------------------------------------------------------------------------|---|---|---|---|---|
| 6756039 | 14-3-3 theta, tyrosine 3-monooxygenase/tryptophan 5-monooxygenase activation protein, theta polypeptide [Mus musc | - | + | + | + | - |
| 6855470 | hepatoma-derived growth factor-related protein HRP-3 [Mus musculus]                                               | - | - | - | + | - |
| 6978509 | adenomatosis polyposis coli [Rattus norvegicus]                                                                   | - | - | - | - | + |
| 6978861 | fucosidase, alpha-L-1, tissue [Rattus norvegicus]                                                                 | - | - | - | + | - |
| 6981420 | pancreatic trypsin 1 [Rattus norvegicus]                                                                          | - | - | - | + | - |
| 6981672 | tropomyosin 4 [Rattus norvegicus]                                                                                 | - | - | - | + | + |
| 7106379 | NACHT, leucine rich repeat and PYD containing 5 isoform a [Mus musculus]                                          | - | - | - | + | - |
| 7106387 | proteasome (prosome, macropain) subunit, alpha type 5 [Mus musculus]                                              | - | - | - | + | + |
| 7106546 | 14-3-3 protein sigma [Mus musculus]                                                                               | - | + | - | - | - |
| 7305075 | ras-GTPase-activating protein SH3-domain binding protein [Mus musculus]                                           | - | - | - | - | + |
| 7305261 | methyl-CpG binding domain protein 3 [Mus musculus]                                                                | - | - | - | + | - |
| 7493836 | multidomain presynaptic cytomatrix protein Piccolo [Rattus norvegicus]                                            | + | - | - | - | - |
| 7657357 | nucleosome assembly protein 1-like 1 [Mus musculus]                                                               | - | - | - | + | - |
| 7710036 | heterogeneous nuclear ribonucleoprotein D-like [Mus musculus]                                                     | - | - | - | + | + |
| 7710046 | kinesin family member 21A [Mus musculus]                                                                          | - | - | - | + | - |
| 7949018 | cell division cycle 37 homolog [Mus musculus]                                                                     | - | - | + | - | - |
| 7949051 | heterogenous nuclear ribonucleoprotein U [Mus musculus]                                                           | - | - | + | + | - |
| 8132999 | voltage-gated potassium channel KCNQ5 [Mus musculus]                                                              | - | - | - | + | - |
| 8347622 | PNGase [Mus musculus]                                                                                             | - | - | - | - | + |
| 8392839 | ATP citrate lyase [Rattus norvegicus]                                                                             | - | - | - | + | - |
| 8393296 | eukaryotic translation elongation factor 2 [Rattus norvegicus]                                                    | - | - | - | + | - |
| 8393544 | heterogeneous nuclear ribonucleoprotein C [Mus musculus]                                                          | - | - | - | + | - |
| 8393696 | stathmin 1 [Rattus norvegicus]                                                                                    | - | - | - | + | + |
| 8394060 | proteasome (prosome, macropain) subunit, alpha type 1 [Rattus norvegicus]                                         | - | - | - | + | - |
| 8394076 | proteasome (prosome, macropain) subunit, alpha type 6 [Rattus norvegicus]                                         | - | - | - | - | + |
| 8394079 | proteasome (prosome, macropain) subunit, beta type 2 [Rattus norvegicus]                                          | - | - | - | + | - |
| 8394082 | proteasome (prosome, macropain) subunit, beta type 3 [Rattus norvegicus]                                          | - | - | - | + | - |
| 8394272 | nuclear distribution gene C homolog [Rattus norvegicus]                                                           | - | - | - | + | - |
| 9295508 | tryptophan hydroxylase [Mus musculus]                                                                             | + | - | - | - | - |
| 9506571 | eukaryotic translation initiation factor 2, subunit 1 alpha [Rattus norvegicus]                                   | - | - | - | + | + |
| 9507013 | protein tyrosine phosphatase, receptor type, F [Rattus norvegicus]                                                | - | - | + | - | - |
| 9507135 | beta-spectrin 3 [Rattus norvegicus]                                                                               | - | - | + | - | - |
| 9588098 | RNA binding protein p42 AUF1 [Rattus norvegicus]                                                                  | - | - | - | - | + |

|          |                                                                                                  |   |   |   |   |   |
|----------|--------------------------------------------------------------------------------------------------|---|---|---|---|---|
| 9789937  | DnaJ (Hsp40) homolog, subfamily A, member 2 [Mus musculus]                                       | - | - | - | + | + |
| 9790017  | prostaglandin E synthase 3 (cytosolic) [Mus musculus]                                            | - | - | - | + | - |
| 9790259  | programmed cell death 5 [Mus musculus]                                                           | - | - | - | - | + |
| 9910570  | polyamine modulated factor 1 binding protein 1 [Mus musculus]                                    | - | - | - | - | + |
| 10048477 | zonadhesin [Mus musculus]                                                                        | - | + | - | - | - |
| 10190662 | nasal embryonic LHRH factor isoform C [Mus musculus]                                             | - | + | - | - | - |
| 10946796 | hypothetical protein LOC75695 [Mus musculus]                                                     | - | - | - | + | - |
| 11120684 | prothymosin alpha [Rattus norvegicus]                                                            | - | + | + | + | + |
| 11559962 | acetyl-coenzyme A carboxylase alpha [Rattus norvegicus]                                          | - | - | - | + | - |
| 11560135 | brain abundant, membrane attached signal protein 1 [Rattus norvegicus]                           | - | + | + | - | - |
| 11693172 | calreticulin [Rattus norvegicus]                                                                 | - | - | - | + | - |
| 11761808 | tyrosine phosphatase LAR [Mus musculus]                                                          | - | - | + | - | - |
| 12002054 | transaldolase [Rattus norvegicus]                                                                | - | - | - | + | + |
| 12004240 | ceramidase [Rattus norvegicus]                                                                   | - | - | - | + | - |
| 12018306 | nucleolin-related protein [Rattus norvegicus]                                                    | - | - | + | + | - |
| 12025520 | testis-specific histone 2a [Rattus norvegicus]                                                   | - | + | - | - | - |
| 12083667 | small glutamine-rich tetratricopeptide repeat (TPR)-containing, alpha [Rattus norvegicus]        | - | - | - | + | + |
| 12248185 | nuclear ubiquitous casein kinase and cyclin-dependent kinase substrate [Rattus norvegicus]       | - | - | - | + | - |
| 12643510 | Adenomatous polyposis coli protein (Protein APC) (mAPC)                                          | - | + | - | - | + |
| 12832063 | unnamed protein product [Mus musculus]                                                           | - | - | - | - | + |
| 12832989 | unnamed protein product [Mus musculus]                                                           | - | - | - | + | - |
| 12839396 | unnamed protein product [Mus musculus]                                                           | - | + | - | - | - |
| 12840821 | unnamed protein product [Mus musculus]                                                           | - | - | - | - | + |
| 12847171 | unnamed protein product [Mus musculus]                                                           | - | - | + | - | - |
| 12848426 | unnamed protein product [Mus musculus]                                                           | - | - | - | - | + |
| 12849712 | unnamed protein product [Mus musculus]                                                           | - | - | + | + | - |
| 12850126 | unnamed protein product [Mus musculus]                                                           | - | - | - | + | - |
| 12852148 | unnamed protein product [Mus musculus]                                                           | - | - | - | + | - |
| 12855620 | unnamed protein product [Mus musculus]                                                           | - | - | - | + | - |
| 12857737 | unnamed protein product [Mus musculus]                                                           | + | - | - | - | - |
| 12963737 | chromosome segregation 1-like [Mus musculus]                                                     | - | - | - | + | - |
| 13124265 | Golgi-specific brefeldin A-resistance guanine nucleotide exchange factor 1 (BFA-resistant GEF 1) | - | - | - | - | + |

|          |                                                                                                             |   |   |   |   |   |
|----------|-------------------------------------------------------------------------------------------------------------|---|---|---|---|---|
| 13272339 | RNA adenosine deaminase 1 [Mus musculus]                                                                    | - | - | + | - | - |
| 13364869 | immunoglobulin heavy chain [Mus musculus]                                                                   | - | - | - | - | + |
| 13385290 | calcium-regulated heat-stable protein (24kD) [Mus musculus]                                                 | - | - | - | + | - |
| 13385872 | interleukin enhancer binding factor 2 [Mus musculus]                                                        | - | - | - | + | - |
| 13385998 | TNF receptor-associated protein 1 [Mus musculus]                                                            | - | - | - | - | + |
| 13430890 | histone 1, H1e [Mus musculus]                                                                               | - | - | - | + | - |
| 13432108 | RecName: Full=EP-cadherin; AltName: Full=C-cadherin; Flags: Precursor                                       | - | - | - | - | + |
| 13432200 | Microtubule-associated protein tau (Neurofibrillary tangle protein) (Paired helical filament-tau) (PHF-tau) | - | - | - | + | - |
| 13442965 | putative chromatin remodeling factor [Mus musculus]                                                         | - | - | - | + | - |
| 13540626 | leucine zipper protein 1 [Rattus norvegicus]                                                                | - | - | - | + | - |
| 13569626 | testis-specific histone binding protein NASP [Mus musculus]                                                 | - | - | - | + | - |
| 13591886 | microtubule-associated protein 1 A [Rattus norvegicus]                                                      | - | - | - | + | - |
| 13591989 | mismatch repair protein 1 [Rattus norvegicus]                                                               | - | - | - | - | + |
| 13592093 | suppression of tumorigenicity 13 [Rattus norvegicus]                                                        | - | - | - | + | + |
| 13786196 | attractin [Rattus norvegicus]                                                                               | - | - | - | - | + |
| 13872552 | von Willebrand Factor [Acomys cahirinus]                                                                    | - | + | - | - | - |
| 13928704 | myosin heavy chain 10, non-muscle [Rattus norvegicus]                                                       | - | - | + | - | - |
| 13928824 | tyrosine 3-monooxygenase/tryptophan 5-monooxygenase activation protein [Rattus norvegicus]                  | - | + | - | - | - |
| 13928926 | MYB binding protein 1a [Rattus norvegicus]                                                                  | - | - | + | + | - |
| 14009840 | mammalian ependymin related protein-2 [Mus musculus]                                                        | - | - | - | - | + |
| 14010837 | NSFL1 (p97) cofactor (p47) [Rattus norvegicus]                                                              | - | - | - | + | + |
| 14010871 | dipeptidylpeptidase 7 [Rattus norvegicus]                                                                   | - | - | - | + | - |
| 14091744 | kalirin, RhoGEF kinase [Rattus norvegicus]                                                                  | - | - | + | - | - |
| 14195015 | Periplakin                                                                                                  | - | - | - | + | - |
| 14916554 | Dpy-30-like protein                                                                                         | - | - | - | + | - |
| 15082258 | chromobox homolog 3 [Homo sapiens]                                                                          | - | - | - | + | - |
| 15186756 | Importin9 isoform 1 [Mus musculus]                                                                          | - | - | - | + | - |
| 15986735 | RRM RNA binding protein NSAP1 [Mus musculus]                                                                | - | - | + | - | - |
| 16506251 | elongation factor-like protein [Mus musculus]                                                               | - | - | - | + | - |
| 16716569 | protease, serine, 1 [Mus musculus]                                                                          | - | - | - | + | - |
| 16758280 | lysosomal trafficking regulator [Rattus norvegicus]                                                         | - | + | - | - | - |
| 16758438 | barrier to autointegration factor 1 [Rattus norvegicus]                                                     | - | - | - | + | - |
| 16758486 | phytanoyl-CoA hydroxylase [Rattus norvegicus]                                                               | - | - | - | + | - |



|          |                                                                                                                                                          |   |   |   |   |   |
|----------|----------------------------------------------------------------------------------------------------------------------------------------------------------|---|---|---|---|---|
| 16758528 | hepatoma-derived growth factor [Rattus norvegicus]                                                                                                       | - | - | - | + | - |
| 16758712 | protein disulfide isomerase-associated 4 [Rattus norvegicus]                                                                                             | - | - | - | - | + |
| 16758920 | TBP-interacting protein 120A [Rattus norvegicus]                                                                                                         | - | - | - | + | - |
| 17380305 | Jumonji/ARID domain-containing protein 1C (Protein SmcX) (Protein Xe169)                                                                                 | - | + | - | - | - |
| 17511228 | RecQ helicase protein-like 5 beta [Mus musculus]                                                                                                         | - | - | + | - | - |
| 18079312 | EMI domain containing 1 [Mus musculus]                                                                                                                   | - | - | - | + | - |
| 18700032 | acidic nuclear phosphoprotein 32 family, member B [Mus musculus]                                                                                         | - | - | - | + | + |
| 19173736 | serine carboxypeptidase 1 [Rattus norvegicus]                                                                                                            | - | - | - | + | - |
| 19527218 | hypothetical protein LOC108707 [Mus musculus]                                                                                                            | - | - | - | - | + |
| 19547877 | alpha-N-acetyl-galactosaminidase [Mus musculus]                                                                                                          | - | - | - | + | - |
| 19705509 | polyamine modulated factor 1 binding protein 1 [Rattus norvegicus]                                                                                       | - | - | - | + | - |
| 20070691 | Myh11 protein [Mus musculus]                                                                                                                             | - | + | - | + | - |
| 20071000 | Nucleolar protein 3 (apoptosis repressor with CARD domain) [Mus musculus]                                                                                | - | - | - | + | - |
| 20127150 | golgi autoantigen, golgin subfamily a, 4 [Mus musculus]                                                                                                  | - | + | - | - | - |
| 20138449 | Glutamate receptor 4 precursor (GluR-4) (GluR4) (GluR-D) (Glutamate receptor ionotropic, AMPA 4) (AMPA-selective glutamate receptor 4)                   | - | - | - | + | - |
| 20138456 | Lysosomal acid lipase/cholesteryl ester hydrolase precursor (LAL) (Acid cholesteryl ester hydrolase) (Sterol esterase) (Lipase A) (Cholesteryl esterase) | - | - | - | + | - |
| 20151205 | Chain E, Crystal Structure Of A Transition State Mimic Of The Catalytic Subunit Of Camp-Dependent Protein Kinase                                         | - | - | - | + | - |
| 20379605 | Plcl2 protein [Mus musculus]                                                                                                                             | + | - | - | - | - |
| 20532380 | Voltage-dependent T-type calcium channel subunit alpha-1H (Voltage-gated calcium channel subunit alpha Cav3.2)                                           | - | - | + | - | - |
| 20916032 | PREDICTED: leucine-rich repeats and guanylate kinase domain containing isoform 1 [Mus musculus]                                                          | - | - | - | - | + |
| 20988799 | Ptk2 protein [Mus musculus]                                                                                                                              | - | + | - | - | - |
| 21312960 | plakophilin 2 [Mus musculus]                                                                                                                             | - | + | - | - | - |
| 21362526 | Ectodysplasin A receptor-associated adapter protein (EDAR-associated death domain protein) (Crinkled protein)                                            | - | - | - | + | - |
| 21426893 | histone 1, H1b [Mus musculus]                                                                                                                            | - | - | - | + | - |
| 21704124 | RNA binding motif protein 10 [Mus musculus]                                                                                                              | - | - | + | - | - |
| 21704176 | THUMP domain containing 1 [Mus musculus]                                                                                                                 | - | - | - | + | - |
| 21735427 | RWD domain containing 1 [Mus musculus]                                                                                                                   | - | - | - | + | - |
| 22122329 | Ellis van Creveld syndrome 2 homolog [Mus musculus]                                                                                                      | - | - | + | - | - |

|          |                                                                                                      |   |   |   |   |   |
|----------|------------------------------------------------------------------------------------------------------|---|---|---|---|---|
| 22122585 | splicing factor, arginine/serine-rich 7 [Mus musculus]                                               | - | - | - | + | - |
| 22122685 | protein phosphatase 1, regulatory (inhibitor) subunit 8 [Mus musculus]                               | - | - | + | - | - |
| 22122693 | hypothetical protein LOC231123 [Mus musculus]                                                        | - | - | - | - | + |
| 23097248 | PLU1 [Mus musculus]                                                                                  | - | + | - | - | - |
| 23271675 | Eif4g3 protein [Mus musculus]                                                                        | - | - | - | + | + |
| 23956214 | splicing factor proline/glutamine rich (polypyrimidine tract binding protein associated) [Mus muscu] | - | - | + | + | - |
| 23956320 | leucine rich repeat containing 45 [Mus musculus]                                                     | - | - | + | - | - |
| 24025637 | heat shock protein 4 [Rattus norvegicus]                                                             | - | - | + | - | - |
| 24418919 | brain glycogen phosphorylase [Mus musculus]                                                          | - | - | - | + | - |
| 24987450 | Chain A, Solution Structure Of Calreticulin P-Domain Subdomain (Residues 221-256)                    | - | - | - | + | - |
| 25282419 | calnexin [Rattus norvegicus]                                                                         | - | - | - | + | + |
| 26325114 | unnamed protein product [Mus musculus]                                                               | - | - | + | - | - |
| 26326779 | unnamed protein product [Mus musculus]                                                               | - | - | - | + | - |
| 26330478 | unnamed protein product [Mus musculus]                                                               | - | + | - | - | - |
| 26331844 | unnamed protein product [Mus musculus]                                                               | - | - | - | - | + |
| 26332983 | unnamed protein product [Mus musculus]                                                               | - | - | - | + | - |
| 26338454 | unnamed protein product [Mus musculus]                                                               | - | - | - | + | - |
| 26343465 | unnamed protein product [Mus musculus]                                                               | - | + | - | - | - |
| 26344996 | unnamed protein product [Mus musculus]                                                               | - | - | - | - | + |
| 26349813 | unnamed protein product [Mus musculus]                                                               | - | + | - | - | - |
| 26350871 | unnamed protein product [Mus musculus]                                                               | - | + | - | - | - |
| 26352123 | unnamed protein product [Mus musculus]                                                               | - | - | + | - | - |
| 26375555 | unnamed protein product [Mus musculus]                                                               | - | - | + | - | - |
| 27370284 | ankyrin repeat and MYND domain containing 1 [Mus musculus]                                           | - | - | - | + | - |
| 27372317 | Piccolo [Mus musculus]                                                                               | + | - | - | - | - |
| 27502097 | myosin-1F-like protein [Mus musculus]                                                                | - | - | + | - | - |
| 27674605 | Mortality factor 4-like protein 2 (MORF-related gene X protein) (Transcriptio                        | - | + | - | - | - |
| 27882143 | Wnk4 protein [Mus musculus]                                                                          | - | - | - | + | - |
| 28076935 | dynactin 2 [Mus musculus]                                                                            | - | - | + | - | - |
| 28173046 | general transcription factor II I [Rattus norvegicus]                                                | - | - | - | + | - |
| 28201882 | RNA-binding protein 39 (RNA-binding motif protein 39) (RNA-binding region-containing protein 2) (Co  | - | - | + | - | - |
| 28204656 | collagen type XXVII proalpha 1 chain [Mus musculus]                                                  | + | - | + | - | - |

|          |                                                                                                                                     |   |   |   |   |   |
|----------|-------------------------------------------------------------------------------------------------------------------------------------|---|---|---|---|---|
| 28316756 | histone 1, H2aa [Mus musculus]                                                                                                      | - | + | - | - | - |
| 28461165 | jumonji domain containing 1A [Rattus norvegicus]                                                                                    | + | - | - | - | - |
| 28461167 | PC4 and SFRS1 interacting protein 1 [Rattus norvegicus]                                                                             | - | - | + | + | + |
| 28467005 | heat shock protein 1, alpha [Rattus norvegicus]                                                                                     | - | - | - | + | - |
| 28481366 | caspase recruitment domain family, member 6 [Mus musculus]                                                                          | - | - | - | + | - |
| 28827826 | oligonucleotide/oligosaccharide-binding fold containing 1 [Mus musculus]                                                            | - | - | - | + | - |
| 28849875 | septin 9 isoform 2 [Rattus norvegicus]                                                                                              | - | - | - | - | + |
| 28916089 | very large inducible GTPase-1 [Mus musculus]                                                                                        | - | - | - | + | - |
| 28948873 | Chain A, Crystal Structure Of Endothelial Nitric Oxide Synthase Peptide Bound To Calmodulin                                         | - | - | - | + | - |
| 28972263 | mKIAA0535 protein [Mus musculus]                                                                                                    | - | - | - | + | - |
| 28972283 | mKIAA0572 protein [Mus musculus]                                                                                                    | - | + | - | - | - |
| 28972804 | mKIAA1632 protein [Mus musculus]                                                                                                    | + | - | - | - | - |
| 29887967 | nebulin-related anchoring protein isoform S [Mus musculus]                                                                          | - | - | + | - | - |
| 30142681 | zinc finger protein 469 [Mus musculus]                                                                                              | - | - | - | + | - |
| 30315937 | Bullous pemphigoid antigen 1, isoforms 1/2/3/4 (BPA) (Hemidesmosomal plaque protein) (Dystonia musc                                 | + | + | - | + | + |
| 30425010 | hypothetical protein LOC102871 [Mus musculus]                                                                                       | - | - | + | - | - |
| 30580620 | TNF receptor-associated factor 6                                                                                                    | - | - | + | - | - |
| 30794400 | epsin 3 [Mus musculus]                                                                                                              | - | - | - | + | - |
| 31791061 | procollagen, type VI, alpha 3 [Mus musculus]                                                                                        | - | + | - | - | - |
| 32527721 | Ac2-067 [Rattus norvegicus]                                                                                                         | - | - | - | + | - |
| 32527749 | Ac2-233 [Rattus norvegicus]                                                                                                         | - | - | - | + | - |
| 32816622 | highwire; PAM; rpm 1 [Mus musculus]                                                                                                 | - | - | + | - | - |
| 33086682 | Da1-6 [Rattus norvegicus]                                                                                                           | - | - | + | - | - |
| 33562963 | C-myc [Paraxerus vexillarius]                                                                                                       | - | - | - | + | - |
| 33859640 | transaldolase 1 [Mus musculus]                                                                                                      | - | - | - | - | + |
| 33990608 | Pdzk4 protein [Mus musculus]                                                                                                        | - | - | - | - | + |
| 34328365 | histone 1, H1d [Mus musculus]                                                                                                       | - | - | - | + | - |
| 34328534 | coagulation factor VIII [Rattus norvegicus]                                                                                         | - | + | - | - | - |
| 34786919 | A-kinase anchor protein 9 [Mus musculus]                                                                                            | + | + | + | + | - |
| 34867825 | Polycystic kidney disease and receptor for egg jelly-related protein precursor (PKD and REJ homolog) [Rattus norvegicus]            | - | - | - | + | - |
| 34871484 | PRotein Associated with Tlr4 [Rattus norvegicus]                                                                                    | - | - | - | - | + |
| 34873389 | Bromodomain adjacent to zinc finger domain protein 1B (Williams-Beuren syndrome chromosome region 9 protein homolog) (WBR5) [Rattus | - | - | - | - | + |

|          | norvegicus]                                                                                         |   |   |   |   |   |
|----------|-----------------------------------------------------------------------------------------------------|---|---|---|---|---|
| 34876714 | eukaryotic translation elongation factor 1 beta 2 [Rattus norvegicus]                               | - | - | - | + | - |
| 37359812 | mKIAA0170 protein [Mus musculus]                                                                    | - | - | - | + | - |
| 37360126 | mKIAA0858 protein [Mus musculus]                                                                    | + | - | - | - | - |
| 37537522 | epiplakin 1 [Mus musculus]                                                                          | - | - | - | - | + |
| 37718976 | microorchidia 2A [Mus musculus]                                                                     | - | + | - | - | - |
| 38016129 | kinesin-related protein KIF27A [Rattus norvegicus]                                                  | - | - | - | + | - |
| 38173724 | Kif21a protein [Mus musculus]                                                                       | - | - | - | - | + |
| 38454234 | collagen, type XXVII, alpha 1 [Rattus norvegicus]                                                   | + | - | - | - | - |
| 38604959 | CUB and sushi domain-containing protein 1 precursor (CUB and sushi multiple domains protein 1)      | + | - | - | - | - |
| 39204553 | chromodomain helicase DNA binding protein 4 [Mus musculus]                                          | - | - | - | + | - |
| 39930325 | kinesin-like 7 [Mus musculus]                                                                       | - | - | + | - | - |
| 40018606 | acid alpha-glucosidase [Rattus norvegicus]                                                          | - | - | - | + | - |
| 40254525 | tropomyosin 3, gamma [Mus musculus]                                                                 | - | - | - | + | - |
| 40287880 | death inducer-obliterators-3 [Mus musculus]                                                         | - | - | + | - | - |
| 40556391 | transforming acidic coiled-coil containing protein 1 short isoform [Mus musculus]                   | - | - | - | + | - |
| 40556608 | heat shock protein 1, beta [Mus musculus]                                                           | + | + | + | + | + |
| 40786451 | eukaryotic translation initiation factor 2, subunit 2 beta, 38kDa [Rattus norvegicus]               | - | - | - | + | - |
| 40849898 | plectin 7 [Rattus norvegicus]                                                                       | - | - | - | + | - |
| 41016936 | Epsin-2 (EPS-15-interacting protein 2)                                                              | - | - | - | + | - |
| 41020839 | reticulon 3 B isoform [Mus musculus]                                                                | - | - | - | + | - |
| 41322904 | plectin 1 isoform 1 [Mus musculus]                                                                  | - | + | - | - | - |
| 41945510 | Dctn1 protein [Mus musculus]                                                                        | - | - | - | + | - |
| 41946089 | Eif4g1 protein [Mus musculus]                                                                       | - | - | - | + | - |
| 45477345 | Slit homolog 3 protein precursor (Slit-3) (Slit3)                                                   | - | - | - | + | - |
| 46049029 | histone 3, H2bb [Mus musculus]                                                                      | - | - | - | - | + |
| 46237553 | procollagen, type XI, alpha 2 [Rattus norvegicus]                                                   | - | + | - | - | - |
| 46396972 | Transaldolase                                                                                       | - | - | - | + | - |
| 46576894 | Lamina-associated polypeptide 2 isoforms alpha/zeta (Thymopoietin isoforms alpha/zeta) (TP alpha/ze | - | - | + | - | - |
| 47116978 | Low-density lipoprotein receptor-related protein 4 precursor (Multiple epidermal growth factor-like | - | - | + | - | - |
| 47606655 | ADAMTS7B [Mus musculus]                                                                             | - | + | - | - | - |

|          |                                                                                                     |   |   |   |   |   |
|----------|-----------------------------------------------------------------------------------------------------|---|---|---|---|---|
| 47847434 | mFLJ00150 protein [Mus musculus]                                                                    | - | - | - | - | + |
| 47894398 | tropomyosin 4 [Mus musculus]                                                                        | - | - | - | + | - |
| 49904697 | Rho GTPase activating protein 21 [Mus musculus]                                                     | - | - | - | + | - |
| 50313177 | potassium voltage-gated channel KQT-like subfamily member 2.4 [Cavia porcellus]                     | - | - | - | + | - |
| 50510473 | mKIAA0400 protein [Mus musculus]                                                                    | - | - | - | - | + |
| 50510559 | mKIAA0634 protein [Mus musculus]                                                                    | - | - | + | - | - |
| 50510583 | mKIAA0676 protein [Mus musculus]                                                                    | - | - | + | - | - |
| 50511029 | mKIAA1623 protein [Mus musculus]                                                                    | - | - | + | - | - |
| 50511035 | mKIAA1634 protein [Mus musculus]                                                                    | - | + | - | - | - |
| 50511083 | mKIAA1745 protein [Mus musculus]                                                                    | - | + | - | - | - |
| 51092303 | Try10-like trypsinogen [Mus musculus]                                                               | - | - | - | + | - |
| 51243731 | nitric oxide synthase 3 [Rattus norvegicus]                                                         | + | - | - | - | - |
| 51316135 | GTP-binding nuclear protein Ran, testis-specific isoform                                            | - | - | - | + | - |
| 51571945 | hypothetical protein LOC67313 [Mus musculus]                                                        | - | + | - | - | - |
| 51593432 | Ptms protein [Mus musculus]                                                                         | - | - | + | + | - |
| 51593641 | Jarid1a protein [Mus musculus]                                                                      | - | - | - | + | - |
| 51712358 | Probable ATP-dependent RNA helicase DDX48 (DEAD box protein 48) (Eukaryotic i                       | - | - | + | - | - |
| 51764932 | hect (homologous to the E6-AP (UBE3A) carboxyl terminus) domain and RCC1 (CHC1)-like domain (RLD) 1 | - | - | + | - | - |
| 51948418 | eukaryotic translation elongation factor 1 gamma [Rattus norvegicus]                                | - | - | + | - | - |
| 52345385 | thioredoxin domain containing 7 [Rattus norvegicus]                                                 | - | - | + | - | - |
| 55700835 | PMES-2D [Rattus norvegicus]                                                                         | - | - | - | + | - |
| 55741770 | subcommissural organ spondin [Rattus norvegicus]                                                    | - | + | - | - | - |
| 55769578 | InaD-like protein isoform 1 [Mus musculus]                                                          | - | - | - | - | + |
| 55778435 | LOC246120 protein [Rattus norvegicus]                                                               | - | - | - | + | + |
| 56001099 | monocytic leukemia zinc finger protein [Rattus norvegicus]                                          | + | - | + | - | - |
| 56090277 | ribosomal protein, large, P1 [Rattus norvegicus]                                                    | - | - | - | + | - |
| 56205806 | novel protein [Mus musculus]                                                                        | + | - | + | - | - |
| 56606037 | hypothetical protein LOC434632 [Mus musculus]                                                       | - | - | - | + | - |
| 57114282 | zinc finger protein 292 [Rattus norvegicus]                                                         | - | + | - | - | - |
| 57977323 | cyclic nucleotide phosphodiesterase 1 [Rattus norvegicus]                                           | - | - | + | - | - |
| 58037495 | hypothetical protein LOC77609 [Mus musculus]                                                        | - | - | - | - | + |
| 58865392 | Ly1 antibody reactive clone [Rattus norvegicus]                                                     | - | - | + | - | - |

|          |                                                                                                                                               |   |   |   |   |   |
|----------|-----------------------------------------------------------------------------------------------------------------------------------------------|---|---|---|---|---|
| 58865802 | sperm associated antigen 1 [Rattus norvegicus]                                                                                                | - | - | + | - | - |
| 58865810 | N-acetyl galactosaminidase, alpha [Rattus norvegicus]                                                                                         | - | - | - | + | - |
| 58865912 | nucleosome assembly protein 1-like 4 [Rattus norvegicus]                                                                                      | - | - | - | + | - |
| 58865966 | tumor rejection antigen gp96 (predicted) [Rattus norvegicus]                                                                                  | - | - | - | + | - |
| 59891440 | non-POU domain containing, octamer-binding [Rattus norvegicus]                                                                                | - | - | + | - | - |
| 60359820 | mFLJ00267 protein [Mus musculus]                                                                                                              | - | - | + | - | - |
| 60359978 | mKIAA4058 protein [Mus musculus]                                                                                                              | - | - | - | - | + |
| 60359998 | mKIAA4127 protein [Mus musculus]                                                                                                              | + | - | - | - | - |
| 60391796 | Abnormal spindle-like microcephaly-associated protein homolog (Calmodulin-binding protein 1) (Spind                                           | + | - | + | - | - |
| 61098031 | apolipoprotein B [Rattus norvegicus]                                                                                                          | - | + | - | + | - |
| 61102728 | inositol 1,4,5-triphosphate receptor 3 [Mus musculus]                                                                                         | - | - | + | - | - |
| 61556967 | eukaryotic translation elongation factor 1 delta [Rattus norvegicus]                                                                          | - | - | - | + | - |
| 62287156 | Protein disulfide-isomerase precursor (PDI) (Prolyl 4-hydroxylase subunit beta) (p58)                                                         | - | - | + | + | - |
| 62543525 | ubiquitin specific peptdiase 1 [Rattus norvegicus]                                                                                            | - | - | - | + | - |
| 62644244 | spindle assembly 6 [Rattus norvegicus]                                                                                                        | - | - | - | + | - |
| 62645879 | Protein C20orf116 homolog precursor [Rattus norvegicus]                                                                                       | - | - | - | + | - |
| 62649996 | vacuolar protein sorting 13D isoform 1 [Rattus norvegicus]                                                                                    | - | + | - | - | - |
| 62653339 | Glucosidase II beta subunit precursor (Protein kinase C substrate, 60.1 kDa protein, heavy chain) (PKCSH) (80K-H protein) [Rattus norvegicus] | - | - | - | + | - |
| 62657360 | RecQ protein-like 5 [Rattus norvegicus]                                                                                                       | - | - | + | - | - |
| 62660717 | microrchidia 2A [Rattus norvegicus]                                                                                                           | - | + | - | - | - |
| 62665990 | glyceraldehyde-3-phosphate dehydrogenase [Rattus norvegicus]                                                                                  | - | - | - | + | - |
| 62738726 | Chain A, VcpP97 COMPLEXED WITH ADP                                                                                                            | - | + | + | + | + |
| 62945366 | hypothetical protein LOC498407 [Rattus norvegicus]                                                                                            | - | - | - | + | - |
| 63079701 | hypothetical protein LOC76857 [Mus musculus]                                                                                                  | - | - | - | + | - |
| 63514363 | 40S ribosomal protein SA (p40) (34/67 kDa laminin receptor) [Mus musculus]                                                                    | - | - | + | - | - |
| 66730360 | microtubule-associated protein 4 [Rattus norvegicus]                                                                                          | - | - | + | + | - |
| 66910589 | Unknown (protein for MGC:114433) [Rattus norvegicus]                                                                                          | - | - | - | + | - |
| 66910589 | Tesb protein [Rattus norvegicus]                                                                                                              | - | - | - | - | + |
| 67078472 | BRF2, subunit of RNA polymerase III transcription initiation factor, BRF1-like [Rattus norvegicus]                                            | - | - | - | + | - |
| 67633286 | microtubule-actin crosslinking factor 1b [Mus musculus]                                                                                       | - | - | + | - | - |
| 68163364 | hypothetical protein LOC290912 [Rattus norvegicus]                                                                                            | - | - | - | + | - |

|          |                                                                                                     |   |   |   |   |   |
|----------|-----------------------------------------------------------------------------------------------------|---|---|---|---|---|
| 68235992 | recombination activating protein 1 [Conilurus penicillatus]                                         | - | - | - | + | - |
| 70909345 | sciellin [Mus musculus]                                                                             | - | - | - | - | + |
| 71151989 | Nascent polypeptide-associated complex subunit alpha, muscle-specific form (Alpha-NAC, muscle-speci | - | - | + | + | - |
| 71162370 | Splicing factor, arginine/serine-rich 7                                                             | - | - | + | - | - |
| 71480173 | CPG2 protein [Rattus norvegicus]                                                                    | + | + | - | + | - |
| 71841553 | TRS4 [Rattus norvegicus]                                                                            | - | - | - | + | - |
| 73536073 | Chain A, X-Ray Structure Of Protein From Mus Musculus Mm.29898                                      | + | - | - | - | - |
| 73620067 | Uncharacterized protein C10orf6 homolog                                                             | - | + | - | - | - |
| 73768833 | Bcas1 protein [Rattus norvegicus]                                                                   | - | - | + | - | - |
| 74137949 | unnamed protein product [Mus musculus]                                                              | - | - | - | - | + |
| 74138682 | unnamed protein product [Mus musculus]                                                              | - | - | - | + | - |
| 74141423 | unnamed protein product [Mus musculus]                                                              | - | - | - | + | - |
| 74142262 | unnamed protein product [Mus musculus]                                                              | - | - | + | - | - |
| 74143165 | unnamed protein product [Mus musculus]                                                              | - | - | - | + | - |
| 74147026 | unnamed protein product [Mus musculus]                                                              | - | - | - | + | + |
| 74178174 | unnamed protein product [Mus musculus]                                                              | - | - | - | + | + |
| 74181041 | unnamed protein product [Mus musculus]                                                              | - | - | - | + | - |
| 74181490 | unnamed protein product [Mus musculus]                                                              | - | - | - | + | - |
| 74184057 | unnamed protein product [Mus musculus]                                                              | - | + | - | - | - |
| 74184392 | unnamed protein product [Mus musculus]                                                              | - | - | - | + | - |
| 74186087 | unnamed protein product [Mus musculus]                                                              | + | - | - | - | - |
| 74186692 | unnamed protein product [Mus musculus]                                                              | - | - | - | - | + |
| 74187552 | unnamed protein product [Mus musculus]                                                              | + | - | - | - | - |
| 74189661 | unnamed protein product [Mus musculus]                                                              | - | - | + | - | - |
| 74196674 | unnamed protein product [Mus musculus]                                                              | - | - | - | + | - |
| 74198765 | unnamed protein product [Mus musculus]                                                              | - | - | - | + | - |
| 74198858 | unnamed protein product [Mus musculus]                                                              | - | - | + | - | - |
| 74201238 | unnamed protein product [Mus musculus]                                                              | + | - | - | - | - |
| 74211398 | unnamed protein product [Mus musculus]                                                              | - | - | - | + | - |
| 74212039 | unnamed protein product [Mus musculus]                                                              | - | - | - | + | - |
| 74214711 | unnamed protein product [Mus musculus]                                                              | - | - | - | - | + |
| 74215924 | unnamed protein product [Mus musculus]                                                              | - | + | - | - | - |
| 74216966 | unnamed protein product [Mus musculus]                                                              | - | - | - | + | - |
| 74219852 | unnamed protein product [Mus musculus]                                                              | - | - | - | + | - |

|          |                                                                                                                                                                                             |   |   |   |   |   |
|----------|---------------------------------------------------------------------------------------------------------------------------------------------------------------------------------------------|---|---|---|---|---|
| 74220199 | unnamed protein product [Mus musculus]                                                                                                                                                      | - | - | + | - | - |
| 74222035 | unnamed protein product [Mus musculus]                                                                                                                                                      | - | - | - | + | - |
| 74222317 | unnamed protein product [Mus musculus]                                                                                                                                                      | - | - | - | - | + |
| 74223027 | unnamed protein product [Mus musculus]                                                                                                                                                      | - | + | - | - | - |
| 76559925 | hypothetical protein LOC360380 [Rattus norvegicus]                                                                                                                                          | - | - | - | + | + |
| 81295345 | hypothetical protein LOC303346 [Rattus norvegicus]                                                                                                                                          | - | - | - | - | + |
| 81295381 | DEAD (Asp-Glu-Ala-Asp) box polypeptide 21a [Rattus norvegicus]                                                                                                                              | - | - | + | - | - |
| 81866430 | NAD(P)H dehydrogenase [quinone] 1 (Quinone reductase 1)<br>(NAD(P)H:quinone oxidoreductase 1) (QR1) (DT-diaphorase) (DTD)<br>(Azoreductase) (Phylloquinone reductase) (Menadione reductase) | - | - | - | + | - |
| 82469900 | trio-associated repeat on actin [Mus musculus]                                                                                                                                              | - | - | + | - | - |
| 82795831 | RNA-binding protein 10 (RNA-binding motif protein 10) (S1-1 protein)<br>isoform                                                                                                             | - | - | + | - | - |
| 82881418 | SLIT-ROBO Rho GTPase-activating protein 2 (srGAP2) (Formin-binding<br>protein 2) isoform 16 [Mus musculus]                                                                                  | - | - | - | + | - |
| 82884526 | RAN, member RAS oncogene family isoform 1 [Mus musculus]                                                                                                                                    | - | - | + | - | - |
| 82885523 | Rab6-interacting protein 2 isoform 1 isoform 5 [Mus musculus]                                                                                                                               | - | - | + | - | - |
| 82894498 | PREDICTED: potassium voltage-gated channel, subfamily Q, member 4<br>isoform 2 [Mus musculus]                                                                                               | - | - | - | + | - |
| 82907595 | PREDICTED: Snf2-related CBP activator protein isoform 1 [Mus musculus]                                                                                                                      | - | - | + | - | - |
| 82933099 | PREDICTED: CXXC finger 6 isoform 1 [Mus musculus]                                                                                                                                           | - | - | + | - | - |
| 82950147 | PREDICTED: desmoplakin isoform 1 [Mus musculus]                                                                                                                                             | - | - | - | + | + |
| 82951459 | heterogeneous nuclear ribonucleoprotein K [Mus musculus]                                                                                                                                    | - | - | + | + | - |
| 82955459 | PREDICTED: LIM domain only 7 isoform 3 [Mus musculus]                                                                                                                                       | - | - | - | + | - |
| 82956279 | c11.1 CG12132-PA [Mus musculus]                                                                                                                                                             | - | - | - | + | - |
| 82965235 | golgi-associated protein GCP360 isoform 7 [Mus musculus]                                                                                                                                    | - | - | + | - | - |
| 84781723 | tumor necrosis factor type 1 receptor associated protein [Rattus norvegicus]                                                                                                                | - | - | + | + | - |
| 84794546 | pleckstrin homology domain containing, family G (with RhoGef domain)<br>member 1 [Mus musculus]                                                                                             | - | - | - | + | - |
| 85544236 | Chain A, Structure Of Tropomyosin's Mid-Region: Bending And Binding<br>Sites For Actin                                                                                                      | - | - | - | - | + |
| 86515432 | SPECC1-like [Rattus norvegicus]                                                                                                                                                             | - | - | - | - | + |
| 87299624 | hypothetical protein LOC338349 isoform 1 [Mus musculus]                                                                                                                                     | - | - | - | + | - |
| 88911344 | Integrin alpha-D precursor (CD11d antigen)                                                                                                                                                  | - | + | - | - | - |
| 89337260 | similar to FTO [Rattus norvegicus]                                                                                                                                                          | - | - | - | + | - |
| 90186270 | microtubule-associated protein 2 isoform 1 [Mus musculus]                                                                                                                                   | - | - | - | + | - |
| 93004085 | pericentrin [Mus musculus]                                                                                                                                                                  | - | - | - | + | - |



|          |                                                                                                     |   |   |   |   |   |
|----------|-----------------------------------------------------------------------------------------------------|---|---|---|---|---|
| 94363673 | CG18437-PA [Mus musculus]                                                                           | - | - | + | + | - |
| 94363690 | tensin [Mus musculus]                                                                               | - | - | + | - | - |
| 94363816 | PREDICTED: procollagen, type VI, alpha 3 isoform 2 [Mus musculus]                                   | - | + | - | + | - |
| 94364887 | PREDICTED: opioid growth factor receptor-like 1 [Mus musculus]                                      | - | - | - | + | - |
| 94366163 | p130Cas-associated protein (p140Cap) (SNAP-25-interacting protein) (SNIP) iso                       | - | + | + | - | - |
| 94366560 | Sodium channel protein type II alpha subunit (Voltage-gated sodium channel al                       | - | - | + | - | - |
| 94366636 | FLJ44048 protein [Mus musculus]                                                                     | - | - | + | - | - |
| 94366925 | PREDICTED: beaded filament structural protein in lens-CP94 [Mus musculus]                           | - | - | + | - | - |
| 94367869 | UPF2 regulator of nonsense transcripts homolog [Mus musculus]                                       | - | - | + | + | - |
| 94367897 | p130Cas-associated protein (p140Cap) (SNAP-25-interacting protein) (SNIP) iso                       | - | - | + | - | - |
| 94367932 | cubilin [Mus musculus]                                                                              | + | + | - | + | + |
| 94368325 | low density lipoprotein receptor-related protein 2 [Mus musculus]                                   | + | - | - | - | - |
| 94369514 | CG15133-PA [Mus musculus]                                                                           | - | + | - | + | - |
| 94369675 | PREDICTED: hypothetical protein [Mus musculus]                                                      | - | + | + | + | - |
| 94370467 | latrophilin 2 [Mus musculus]                                                                        | + | - | - | - | - |
| 94370595 | [Segment 1 of 2] Traf2 and NCK-interacting kinase [Mus musculus]                                    | + | - | + | - | - |
| 94370954 | nucleoporin 210kDa-like [Mus musculus]                                                              | - | - | - | + | - |
| 94371022 | Cingulin [Mus musculus]                                                                             | - | - | + | - | - |
| 94371031 | PREDICTED: hypothetical protein LOC75137 [Mus musculus]                                             | - | - | - | + | - |
| 94372354 | Microtubule-actin crosslinking factor 1 (Actin cross-linking family 7) isoform                      | + | + | + | + | + |
| 94372565 | PREDICTED: hypothetical protein [Mus musculus]                                                      | - | - | - | + | - |
| 94372693 | pleckstrin homology domain containing, family M (with RUN domain) member 1 isoform 7 [Mus musculus] | - | - | - | + | - |
| 94372892 | vacuolar protein sorting 13D isoform 1 isoform 6 [Mus musculus]                                     | - | + | - | - | - |
| 94372919 | PRAME family member 8 [Mus musculus]                                                                | - | - | - | + | - |
| 94373195 | Zinc finger protein Rlf (Rearranged L-myc fusion gene protein) (Zn-15 related                       | + | + | - | + | + |
| 94373266 | PREDICTED: hypothetical protein LOC381522 [Mus musculus]                                            | + | + | - | - | - |
| 94373681 | PREDICTED: rearranged L-myc fusion sequence [Mus musculus]                                          | - | - | + | + | - |
| 94373699 | Microtubule-actin crosslinking factor 1 (Actin cross-linking family 7) isoform 10 [Mus musculus]    | - | + | - | - | - |
| 94374512 | CBF1 interacting corepressor [Mus musculus]                                                         | - | - | - | + | - |
| 94375120 | PREDICTED: myosin XVIIIb [Mus musculus]                                                             | + | - | - | - | - |

|          |                                                                                                                                    |   |   |   |   |   |
|----------|------------------------------------------------------------------------------------------------------------------------------------|---|---|---|---|---|
| 94375804 | furry CG32045-PC, isoform C [Mus musculus]                                                                                         | - | - | - | + | + |
| 94376765 | PREDICTED: hypothetical protein LOC330188 [Mus musculus]                                                                           | - | - | - | + | - |
| 94377131 | Filamin-C (Gamma-filamin) (Filamin-2) (FLN-C) (Actin-binding-like protein) (ABP-L) (ABP-280-like protein) isoform 3 [Mus musculus] | - | + | - | - | - |
| 94377177 | Receptor-type tyrosine-protein phosphatase zeta precursor (R-PTP-zeta) (Phosp                                                      | + | - | + | - | - |
| 94380694 | RIKEN cDNA 5730590G19-like isoform 2 [Mus musculus]                                                                                | - | - | - | + | - |
| 94381092 | remodeling and spacing factor 1 isoform 12 [Mus musculus]                                                                          | + | + | + | - | + |
| 94381178 | very large inducible GTPase 1 isoform A [Mus musculus]                                                                             | - | + | - | - | - |
| 94381279 | PREDICTED: ubiquitin specific protease 31 [Mus musculus]                                                                           | - | - | - | + | + |
| 94381384 | gamma-aminobutyric acid (GABA-B) receptor binding protein [Mus musculus]                                                           | - | - | + | - | - |
| 94381425 | SH3/ankyrin domain gene 2 isoform a isoform 6 [Mus musculus]                                                                       | + | + | - | - | - |
| 94382625 | very large inducible GTPase 1 isoform A [Mus musculus]                                                                             | + | + | + | + | - |
| 94383734 | prothymosin alpha [Mus musculus]                                                                                                   | - | - | - | + | - |
| 94383859 | Zinc finger protein 469 [Mus musculus]                                                                                             | - | - | + | - | - |
| 94385811 | PREDICTED: hypothetical protein [Mus musculus]                                                                                     | - | - | + | - | - |
| 94385827 | Down syndrome cell adhesion molecule like 1 [Mus musculus]                                                                         | - | + | - | - | - |
| 94387119 | heat shock protein 8 [Mus musculus]                                                                                                | - | + | - | - | - |
| 94387606 | alpha 3 type VI collagen isoform 1 precursor [Mus musculus]                                                                        | - | - | - | + | - |
| 94388538 | PREDICTED: hypothetical protein LOC380654 [Mus musculus]                                                                           | - | + | - | + | - |
| 94388876 | neuron navigator 3 isoform 2 [Mus musculus]                                                                                        | - | + | - | - | - |
| 94390352 | procollagen, type XXIII, alpha 1 [Mus musculus]                                                                                    | + | - | + | - | - |
| 94391389 | PREDICTED: hypothetical protein [Mus musculus]                                                                                     | - | - | - | + | - |
| 94392330 | Actin, cytoplasmic 2 (Gamma-actin) [Mus musculus]                                                                                  | - | + | + | + | - |
| 94392909 | PREDICTED: Son of sevenless homolog 2 [Mus musculus]                                                                               | - | - | - | + | - |
| 94392970 | PREDICTED: synaptic nuclear envelope 2 [Mus musculus]                                                                              | - | + | - | - | - |
| 94392981 | PREDICTED: pleckstrin homology domain containing, family H (with MyTH4 domain) member 1 isoform 1 [                                | - | + | - | - | - |
| 94393038 | CG15625-PA [Mus musculus]                                                                                                          | - | - | - | - | + |
| 94393455 | PREDICTED: serine (or cysteine) proteinase inhibitor, clade A, member 1d [Mus musculus]                                            | - | - | - | + | - |
| 94393584 | tudor domain containing 9 [Mus musculus]                                                                                           | + | - | - | - | - |
| 94393802 | gamma-aminobutyric acid (GABA-B) receptor binding protein [Mus musculus]                                                           | - | - | + | - | - |
| 94394154 | spectrin repeat containing, nuclear envelope 2 isoform a [Mus musculus]                                                            | + | - | + | + | - |

|           |                                                                                                       |   |   |   |   |   |
|-----------|-------------------------------------------------------------------------------------------------------|---|---|---|---|---|
| 94394398  | Protein KIAA0329/KIAA0297 [Mus musculus]                                                              | - | + | - | - | - |
| 94394734  | Histone H2B F (H2B 291A) [Mus musculus]                                                               | - | - | + | - | - |
| 94395136  | H2A histone family, member O [Mus musculus]                                                           | - | + | - | - | - |
| 94395399  | cell recognition molecule CASPR3 [Mus musculus]                                                       | + | - | - | - | - |
| 94395663  | PREDICTED: zinc finger, SWIM domain containing 6 [Mus musculus]                                       | + | - | + | - | - |
| 94396820  | FERM and PDZ domain containing 2 isoform 1 [Mus musculus]                                             | - | - | + | - | - |
| 94397360  | PREDICTED: hypothetical protein [Mus musculus]                                                        | - | - | + | - | - |
| 94398873  | PREDICTED: PDZ domain containing RING finger 4 [Mus musculus]                                         | - | + | - | + | - |
| 94399246  | CG6745-PA [Mus musculus]                                                                              | - | - | + | - | - |
| 94399425  | triple functional domain (PTPRF interacting) [Mus musculus]                                           | + | + | + | - | + |
| 94399459  | Ubiquitin-protein ligase EDD1 (Hyperplastic discs protein homolog) [Mus muscu]                        | + | + | + | + | - |
| 94399569  | zinc finger transcription factor TRPS1 [Mus musculus]                                                 | - | - | + | - | - |
| 94400809  | Synaptojanin-1 (Synaptic inositol-1,4,5-trisphosphate 5-phosphatase 1) [Mus m]                        | + | - | + | - | + |
| 94400827  | PREDICTED: hypothetical protein LOC385668 [Mus musculus]                                              | - | + | - | - | - |
| 94401256  | AMY-1-associating protein expressed in testis 1 homolog (AAT-1) [Mus musculus]                        | - | + | - | - | - |
| 94401552  | PREDICTED: RNA binding motif protein 16 isoform 1 [Mus musculus]                                      | - | - | - | + | + |
| 94402499  | serine/arginine repetitive matrix 2 [Mus musculus]                                                    | - | - | + | - | - |
| 94403242  | AT rich interactive domain 1B (SWI1-like) isoform 3 [Mus musculus]                                    | + | + | + | + | - |
| 94403322  | Afadin (Af-6 protein) [Mus musculus]                                                                  | - | + | + | - | - |
| 94403752  | Mediator of DNA damage checkpoint protein 1 [Mus musculus]                                            | - | - | + | + | - |
| 94404707  | Laminin alpha-3 chain precursor (Nicein alpha subunit) [Mus musculus]                                 | - | + | - | - | - |
| 94404773  | jumonji domain containing 1B [Mus musculus]                                                           | - | - | + | - | + |
| 94406727  | myoferlin isoform b [Mus musculus]                                                                    | - | - | - | - | + |
| 94406729  | Protein FRA10AC1 homolog [Mus musculus]                                                               | - | - | - | - | + |
| 94408289  | insulin receptor substrate 4 [Mus musculus]                                                           | + | - | - | + | - |
| 94408514  | high-mobility group box 3 [Mus musculus]                                                              | - | - | - | + | - |
| 94409952  | PREDICTED: TD and POZ domain containing 3 [Mus musculus]                                              | - | - | + | - | - |
| 94411699  | Splicing factor, arginine/serine-rich 3 (Pre-mRNA splicing factor SRP20) (X16 protein) [Mus musculus] | - | - | - | + | - |
| 95108238  | ribonuclease L [Cavia porcellus]                                                                      | + | - | - | - | - |
| 97536151  | Ephrin type-A receptor 6 precursor (Tyrosine-protein kinase receptor EHK-2) (EPH homology kinase 2)   | - | + | + | - | - |
| 109156929 | Chain A, The Structure Of Collagen Type I. Single Type I Collagen                                     | + | + | - | - | - |

|           | Molecule                                                                                                                                                                 |   |   |   |   |   |
|-----------|--------------------------------------------------------------------------------------------------------------------------------------------------------------------------|---|---|---|---|---|
| 109457551 | SNF2 histone linker PHD RING helicase [Rattus norvegicus]                                                                                                                | - | + | - | - | - |
| 109458074 | PREDICTED: hypothetical protein [Rattus norvegicus]                                                                                                                      | - | - | - | + | - |
| 109458408 | serologically defined colon cancer antigen 1 [Rattus norvegicus]                                                                                                         | + | + | - | - | - |
| 109458570 | Ubiquitin-like 1-activating enzyme E1B (SUMO-1-activating enzyme subunit 2) (Anthracycline-associated resistance ARX) [Rattus norvegicus]                                | - | - | - | + | - |
| 109458829 | hect (homologous to the E6-AP (UBE3A) carboxyl terminus) domain and RCC1 (CHC)                                                                                           | - | + | - | - | - |
| 109458927 | A-kinase anchor protein 13 isoform 2 [Rattus norvegicus]                                                                                                                 | + | + | + | + | - |
| 109459149 | nuclear mitotic apparatus protein 1 [Rattus norvegicus]                                                                                                                  | - | - | - | + | - |
| 109459174 | Tripartite motif protein 6 [Rattus norvegicus]                                                                                                                           | - | - | - | + | - |
| 109459194 | PREDICTED: hypothetical protein [Rattus norvegicus]                                                                                                                      | - | + | - | + | - |
| 109459624 | mucin 6, gastric [Rattus norvegicus]                                                                                                                                     | - | + | - | + | - |
| 109460167 | Protein C10orf6 homolog [Rattus norvegicus]                                                                                                                              | - | + | - | - | - |
| 109460972 | Transcription intermediary factor 1-beta (TIF1-beta) (Tripartite motif protein 28) (KRAB-A-interacting protein) (KRIP-1) [Rattus norvegicus]                             | - | - | - | + | - |
| 109462151 | A-kinase anchor protein 13 isoform 1 [Rattus norvegicus]                                                                                                                 | - | - | - | - | + |
| 109462212 | Semaphorin-4B precursor (Semaphorin C) (Sema C) [Rattus norvegicus]                                                                                                      | + | - | - | - | - |
| 109462616 | PREDICTED: hypothetical protein [Rattus norvegicus]                                                                                                                      | - | - | + | - | - |
| 109462691 | Eukaryotic translation initiation factor 4 gamma 2 (eIF-4-gamma 2) (eIF-4G 2) (eIF4G 2) (p97) (Novel APOBEC-1 target 1) (Translation repressor NAT1) [Rattus norvegicus] | - | - | - | + | + |
| 109463815 | Pantothenate kinase 1 (Pantothenic acid kinase 1) (mPank1) (mPank) [Rattus norvegicus]                                                                                   | - | - | - | + | - |
| 109464719 | Phosphatidylinositol-4,5-bisphosphate 3-kinase catalytic subunit alpha isoform                                                                                           | - | + | - | + | - |
| 109465161 | Trichohyalin [Rattus norvegicus]                                                                                                                                         | - | - | - | - | + |
| 109465257 | histone H2A [Rattus norvegicus]                                                                                                                                          | - | - | - | + | - |
| 109465389 | Moloney leukemia virus 10 [Rattus norvegicus]                                                                                                                            | - | - | - | + | - |
| 109465434 | PREDICTED: hypothetical protein [Rattus norvegicus]                                                                                                                      | + | - | + | - | - |
| 109465607 | centromere protein E [Rattus norvegicus]                                                                                                                                 | - | + | - | + | - |
| 109466297 | Transcription factor E2F5 (E2F-5) [Rattus norvegicus]                                                                                                                    | - | - | - | + | - |
| 109467590 | Heat shock protein HSP 90-beta (HSP 84) [Rattus norvegicus]                                                                                                              | - | - | + | - | - |
| 109467596 | ankyrin 2 isoform 1 [Rattus norvegicus]                                                                                                                                  | - | - | + | - | - |
| 109468170 | nebulin-related anchoring protein isoform C [Rattus norvegicus]                                                                                                          | - | + | - | - | - |
| 109468608 | ryanodine receptor 3 [Rattus norvegicus]                                                                                                                                 | + | + | + | + | + |
| 109468688 | Spectrin beta chain, brain 4 (Spectrin, non-erythroid beta chain 4) (Beta-V s                                                                                            | + | - | - | + | - |

|           |                                                                                                                                                                                                     |   |   |   |   |   |
|-----------|-----------------------------------------------------------------------------------------------------------------------------------------------------------------------------------------------------|---|---|---|---|---|
| 109468704 | codanin 1 [Rattus norvegicus]                                                                                                                                                                       | - | - | + | - | + |
| 109468755 | sarcoma antigen NY-SAR-41 [Rattus norvegicus]                                                                                                                                                       | - | - | + | - | - |
| 109469341 | death inducer-obliterator 1 isoform 3 [Rattus norvegicus]                                                                                                                                           | - | - | + | - | - |
| 109469632 | PREDICTED: inositol polyphosphate-5-phosphatase E [Rattus norvegicus]                                                                                                                               | - | + | - | - | + |
| 109469832 | low density lipoprotein-related protein 1B [Rattus norvegicus]                                                                                                                                      | - | - | - | + | - |
| 109469974 | ring finger protein 128 [Rattus norvegicus]                                                                                                                                                         | - | - | - | + | - |
| 109470173 | FLJ44048 protein [Rattus norvegicus]                                                                                                                                                                | - | + | + | - | + |
| 109470641 | cancer susceptibility candidate 5 isoform 1 [Rattus norvegicus]                                                                                                                                     | - | - | - | + | - |
| 109471751 | Heterogeneous nuclear ribonucleoprotein G (hnRNP G) (RNA-binding motif protei                                                                                                                       | - | - | + | - | - |
| 109472568 | Cat eye syndrome critical region protein 2 [Rattus norvegicus]                                                                                                                                      | - | - | - | - | + |
| 109472626 | Peroxisomal targeting signal 1 receptor (Peroxisome receptor 1) (Peroxisomal C-terminal targeting signal import receptor) (PTS1-BP) (Peroxin-5) (PTS1 receptor) (PXR1P) (PTS1R) [Rattus norvegicus] | - | + | - | - | - |
| 109473583 | nucleosome assembly protein 1-like 5 [Rattus norvegicus]                                                                                                                                            | - | - | + | - | + |
| 109474242 | von Willebrand factor [Rattus norvegicus]                                                                                                                                                           | - | - | - | + | - |
| 109475032 | gene amplified in squamous cell carcinoma 1 [Rattus norvegicus]                                                                                                                                     | + | + | - | - | - |
| 109475353 | PREDICTED: hypothetical protein [Rattus norvegicus]                                                                                                                                                 | - | + | + | + | - |
| 109475443 | microfilament and actin filament cross-linker protein isoform a [Rattus norve                                                                                                                       | - | + | - | + | - |
| 109475468 | inositol polyphosphate-5-phosphatase B [Rattus norvegicus]                                                                                                                                          | + | - | + | - | - |
| 109475613 | mitogen-activated protein kinase kinase kinase 6 [Rattus norvegicus]                                                                                                                                | - | + | - | - | - |
| 109475770 | regulatory solute carrier protein, family 1, member 1 [Rattus norvegicus]                                                                                                                           | - | - | + | + | - |
| 109476036 | DEP domain containing 2 isoform a [Rattus norvegicus]                                                                                                                                               | - | - | + | + | - |
| 109476682 | HBxAg transactivated protein 2 [Rattus norvegicus]                                                                                                                                                  | - | - | - | + | - |
| 109477946 | baculoviral IAP repeat-containing 6 [Rattus norvegicus]                                                                                                                                             | + | - | - | + | - |
| 109478244 | Mitogen-activated protein kinase kinase kinase 5 (MAPK/ERK kinase kina                                                                                                                              | - | + | - | - | - |
| 109478300 | H2A histone family, member V isoform 1 [Rattus norvegicus]                                                                                                                                          | - | - | - | - | + |
| 109478334 | Disheveled-associated activator of morphogenesis 1 [Rattus norvegicus]                                                                                                                              | - | - | + | - | - |
| 109478374 | pleckstrin homology domain containing, family G, member 3 [Rattus norvegicus]                                                                                                                       | - | - | - | + | - |
| 109478389 | PREDICTED: hypothetical protein [Rattus norvegicus]                                                                                                                                                 | - | - | + | + | - |
| 109478654 | thyroid hormone receptor interactor 11 [Rattus norvegicus]                                                                                                                                          | - | - | + | - | - |
| 109478692 | serine (or cysteine) peptidase inhibitor, clade A, member 3B [Rattus norvegicus]                                                                                                                    | - | - | - | + | - |
| 109478747 | PREDICTED: hypothetical protein [Rattus norvegicus]                                                                                                                                                 | - | - | + | - | - |

|           |                                                                                                                                  |   |   |   |   |   |
|-----------|----------------------------------------------------------------------------------------------------------------------------------|---|---|---|---|---|
| 109478930 | Son of sevenless homolog 1 [Rattus norvegicus]                                                                                   | - | + | - | + | - |
| 109479483 | FERM domain containing protein 6 (FERM-domain-containing protein 163SCII) [Ra]                                                   | + | - | - | - | - |
| 109479539 | Nesprin-2 (Nuclear envelope spectrin repeat protein 2) (Syne-2) (Synaptic nuc                                                    | + | + | + | + | - |
| 109479556 | PREDICTED: hypothetical protein [Rattus norvegicus]                                                                              | - | - | + | - | - |
| 109480121 | Nascent polypeptide-associated complex alpha subunit, muscle-specific form (Alpha-NAC, muscle-specific form) [Rattus norvegicus] | - | - | - | + | - |
| 109480323 | microrchidia 2B [Rattus norvegicus]                                                                                              | - | + | - | - | - |
| 109480435 | myosin binding protein C, slow type [Rattus norvegicus]                                                                          | - | + | - | - | - |
| 109480505 | neuron navigator 3 [Rattus norvegicus]                                                                                           | - | + | - | - | - |
| 109480528 | centrosome protein cep290 [Rattus norvegicus]                                                                                    | - | - | - | + | - |
| 109480547 | PTPRF interacting protein alpha 2 [Rattus norvegicus]                                                                            | - | - | + | - | - |
| 109480712 | Ubiquitin-protein ligase EDD1 (Hyperplastic discs protein homolog) [Rattus no                                                    | - | + | - | - | - |
| 109480822 | melanoma-derived leucine zipper, extra-nuclear factor [Rattus norvegicus]                                                        | - | - | - | + | - |
| 109480932 | Epiplakin [Rattus norvegicus]                                                                                                    | - | + | - | - | + |
| 109481006 | DEAD box polypeptide 17 isoform p82 [Rattus norvegicus]                                                                          | - | + | - | - | - |
| 109481204 | PDZ domain-containing RING finger protein 4 (Ligand of Numb-protein X 4) (SEM                                                    | + | - | - | + | + |
| 109481370 | Separin (Separase) (Caspase-like protein ESPL1) (Extra spindle poles-like 1 p                                                    | - | + | - | - | - |
| 109481881 | plexin C1 [Rattus norvegicus]                                                                                                    | - | + | - | - | - |
| 109482186 | Golgi-localized syntaphilin-related protein isoform A [Rattus norvegicus]                                                        | - | + | - | - | - |
| 109482600 | trinucleotide repeat containing 6b isoform 1 [Rattus norvegicus]                                                                 | - | - | - | + | - |
| 109483182 | CG14127-PA [Rattus norvegicus]                                                                                                   | - | - | - | - | + |
| 109483405 | Zinc finger protein HRX (ALL-1) [Rattus norvegicus]                                                                              | - | - | - | + | - |
| 109483662 | guanine nucleotide exchange factor p532 [Rattus norvegicus]                                                                      | - | + | + | + | - |
| 109483966 | procollagen, type VII, alpha 1 [Rattus norvegicus]                                                                               | - | - | + | + | - |
| 109484014 | PREDICTED: hypothetical protein [Rattus norvegicus]                                                                              | - | + | - | - | - |
| 109484809 | nuclear membrane binding protein NUCLING [Rattus norvegicus]                                                                     | - | - | - | + | - |
| 109484871 | guanine nucleotide exchange factor p532 [Rattus norvegicus]                                                                      | - | - | + | - | - |
| 109485422 | Macrophage-stimulating protein receptor precursor (MSP receptor) (p185-Ron) (                                                    | + | - | - | - | - |
| 109485903 | PREDICTED: eukaryotic translation initiation factor 4 gamma, 2 [Rattus norvegicus]                                               | - | - | - | + | - |
| 109485920 | dystonin isoform b [Rattus norvegicus]                                                                                           | + | + | + | + | + |

|           |                                                                                                                                                              |   |   |   |   |   |
|-----------|--------------------------------------------------------------------------------------------------------------------------------------------------------------|---|---|---|---|---|
| 109485997 | mitogen-activated protein kinase kinase kinase kinase 4 isoform 1 [Rattus norvegicus]                                                                        | - | + | + | + | + |
| 109486259 | wingless-related MMTV integration site 6 [Rattus norvegicus]                                                                                                 | - | + | - | - | - |
| 109486345 | alpha 3 type VI collagen isoform 2 precursor [Rattus norvegicus]                                                                                             | - | + | - | - | - |
| 109486388 | Kinesin-like protein KIF1A (Axonal transporter of synaptic vesicles) [Rattus norvegicus]                                                                     | - | - | - | + | - |
| 109486390 | ciliary rootlet coiled-coil, rootletin [Rattus norvegicus]                                                                                                   | - | + | - | - | - |
| 109486503 | phospholipase C-like 2 [Rattus norvegicus]                                                                                                                   | + | - | + | - | - |
| 109486769 | zinc finger protein 318 isoform 1 [Rattus norvegicus]                                                                                                        | - | - | + | - | + |
| 109486914 | dystonin isoform a [Rattus norvegicus]                                                                                                                       | - | + | + | + | - |
| 109487761 | Periplakin [Rattus norvegicus]                                                                                                                               | - | - | - | + | - |
| 109487812 | serine/arginine repetitive matrix 2 [Rattus norvegicus]                                                                                                      | + | - | + | - | - |
| 109488113 | Ras-GTPase-activating protein binding protein 1 (ATP-dependent DNA helicase VIII) (GAP SH3-domain binding protein 1) (G3BP-1) (HDH-VIII) [Rattus norvegicus] | - | - | - | + | + |
| 109488196 | obscurin, cytoskeletal calmodulin and titin-interacting RhoGEF [Rattus norvegicus]                                                                           | - | - | - | - | + |
| 109488269 | nuclear receptor co-repressor 1 [Rattus norvegicus]                                                                                                          | + | - | + | + | + |
| 109488740 | testis expressed gene 14 [Rattus norvegicus]                                                                                                                 | - | - | + | - | + |
| 109488744 | myotubularin related protein 4 [Rattus norvegicus]                                                                                                           | + | - | - | - | - |
| 109488886 | Chromobox protein homolog 1 (Heterochromatin protein 1 homolog beta) (HP1 bet)                                                                               | - | - | + | - | - |
| 109489144 | proline-rich protein [Rattus norvegicus]                                                                                                                     | - | - | - | + | - |
| 109489297 | ATP-binding cassette, sub-family A (ABC1), member 8a [Rattus norvegicus]                                                                                     | - | - | + | + | - |
| 109489481 | chromosome 17 open reading frame 27 [Rattus norvegicus]                                                                                                      | - | - | + | - | - |
| 109489492 | 5-azacytidine-induced protein 1 (Pre-acrosome localization protein 1) [Rattus norvegicus]                                                                    | - | - | - | - | + |
| 109489498 | Actin, cytoplasmic 2 (Gamma-actin) [Rattus norvegicus]                                                                                                       | - | - | - | + | - |
| 109491751 | Chromobox protein homolog 1 (Heterochromatin protein 1 homolog beta) (HP1 bet)                                                                               | - | - | + | - | - |
| 109491976 | PREDICTED: hypothetical protein [Rattus norvegicus]                                                                                                          | - | + | - | - | - |
| 109492050 | Temporarily Assigned Gene name family member (tag-58) [Rattus norvegicus]                                                                                    | + | + | - | + | - |
| 109492318 | DEAD (Asp-Glu-Ala-Asp) box polypeptide 48 [Rattus norvegicus]                                                                                                | - | - | + | - | - |
| 109492345 | chromosome 17 open reading frame 27 [Rattus norvegicus]                                                                                                      | - | - | + | - | - |
| 109492380 | Actin, cytoplasmic 2 (Gamma-actin) [Rattus norvegicus]                                                                                                       | - | - | - | + | - |
| 109493032 | absent in melanoma 1 [Rattus norvegicus]                                                                                                                     | - | - | - | + | - |

|           |                                                                               |   |   |   |   |   |
|-----------|-------------------------------------------------------------------------------|---|---|---|---|---|
| 109493288 | PREDICTED: hypothetical protein [Rattus norvegicus]                           | - | - | - | + | - |
| 109493341 | syntaxin binding protein 5-like [Rattus norvegicus]                           | - | + | + | - | - |
| 109495915 | cut-like 2 [Rattus norvegicus]                                                | - | - | - | + | - |
| 109496592 | Transformation/transcription domain-associated protein (350/400 kDa PCAF-asso | - | + | - | + | + |
| 109497135 | zonadhesin [Rattus norvegicus]                                                | - | + | + | + | - |
| 109497472 | GCN1 general control of amino-acid synthesis 1-like 1 [Rattus norvegicus]     | + | + | + | + | - |
| 109497926 | Kinesin family member 21B [Rattus norvegicus]                                 | - | + | - | - | - |
| 109497977 | complement component factor H [Rattus norvegicus]                             | - | + | - | - | - |
| 109498009 | hemicentin 1 [Rattus norvegicus]                                              | - | + | - | - | - |
| 109498024 | SMG-7 homolog [Rattus norvegicus]                                             | + | - | - | - | - |
| 109498079 | astrotactin 1 [Rattus norvegicus]                                             | - | + | - | - | - |
| 109498360 | centromere protein F (350/400kD) [Rattus norvegicus]                          | + | - | - | - | - |
| 109499224 | usherin isoform B [Rattus norvegicus]                                         | - | + | - | - | - |
| 109499467 | WD repeat and FYVE domain containing 3 [Rattus norvegicus]                    | + | + | - | - | - |
| 109499493 | BMP2 inducible kinase [Rattus norvegicus]                                     | + | - | - | - | - |
| 109499495 | Fras1 protein [Rattus norvegicus]                                             | + | - | - | - | - |
| 109499587 | Ephrin type-A receptor 5 precursor (Tyrosine-protein kinase receptor EHK-1) ( | + | + | - | - | - |
| 109499874 | tropomyosin 1, alpha isoform c [Rattus norvegicus]                            | - | - | + | - | - |
| 109499995 | ankyrin repeat domain 26 [Rattus norvegicus]                                  | - | - | + | - | - |
| 109500046 | ATP binding cassette, sub-family A (ABC1), member 13 [Rattus norvegicus]      | - | - | - | + | + |
| 109500758 | CG5514-PB, isoform B [Rattus norvegicus]                                      | - | - | + | + | + |
| 109501541 | kinectin 1 [Rattus norvegicus]                                                | - | + | + | - | + |
| 109501601 | proteasome (prosome, macropain) subunit, beta type 5 [Rattus norvegicus]      | - | - | - | - | + |
| 109501619 | centromere protein J [Rattus norvegicus]                                      | - | + | - | - | - |
| 109501906 | F11C1.5a [Rattus norvegicus]                                                  | - | + | - | - | - |
| 109501964 | pam, highwire, rpm 1 [Rattus norvegicus]                                      | - | - | + | - | - |
| 109502306 | kinectin 1 [Rattus norvegicus]                                                | - | + | - | - | + |
| 109502592 | Retinitis pigmentosa 1-like 1 protein (Retinitis pigmentosa 1-like protein 1) | - | + | + | - | - |
| 109503199 | Interleukin-12 receptor beta-1 chain precursor (IL-12R-beta1) (Interleukin-12 | - | + | - | - | - |
| 109503286 | PREDICTED: hypothetical protein [Rattus norvegicus]                           | - | - | - | + | + |
| 109503303 | Serine/threonine-protein kinase Nek1 (NimA-related protein kinase 1) (NY-REN- | - | + | - | - | - |



|           |                                                                                                                                                                         |   |   |   |   |   |
|-----------|-------------------------------------------------------------------------------------------------------------------------------------------------------------------------|---|---|---|---|---|
| 109503360 | odd Oz/ten-m homolog 3 [Rattus norvegicus]                                                                                                                              | - | - | + | + | - |
| 109503443 | deleted in liver cancer 1 isoform 1 [Rattus norvegicus]                                                                                                                 | - | - | - | + | - |
| 109503544 | PREDICTED: hypothetical protein [Rattus norvegicus]                                                                                                                     | - | + | - | - | - |
| 109504733 | chromosome 9 open reading frame 79 [Rattus norvegicus]                                                                                                                  | - | - | - | - | + |
| 109504808 | Zinc finger protein 40 (Transcription factor alphaA-CRYBP1) (Alpha A-crystallin-binding protein I) (Alpha A-CRYBP1) [Rattus norvegicus]                                 | - | - | - | + | - |
| 109505150 | La ribonucleoprotein domain family, member 5 [Rattus norvegicus]                                                                                                        | - | - | - | - | + |
| 109505989 | Histone H2A type 1 [Rattus norvegicus]                                                                                                                                  | - | + | - | + | - |
| 109506581 | Dmx-like 1 [Rattus norvegicus]                                                                                                                                          | - | - | + | - | - |
| 109507931 | nuclear factor I/X (CCAAT-binding transcription factor) [Rattus norvegicus]                                                                                             | - | - | - | + | - |
| 109507954 | Eukaryotic translation initiation factor 2 subunit 1 (Eukaryotic translation initiation factor 2 alpha subunit) (eIF-2-alpha) (EIF-2alpha) (EIF-2A) [Rattus norvegicus] | - | - | - | + | - |
| 109508134 | hydrocephalus inducing [Rattus norvegicus]                                                                                                                              | - | - | - | - | + |
| 109508238 | Zinc finger protein 469 [Rattus norvegicus]                                                                                                                             | - | - | + | - | + |
| 109508892 | splicing factor 3b, subunit 3 [Rattus norvegicus]                                                                                                                       | - | + | - | - | - |
| 109509031 | AFG3(ATPase family gene 3)-like 1 [Rattus norvegicus]                                                                                                                   | - | - | - | + | - |
| 109509330 | minichromosome maintenance protein 3 associated protein [Rattus norvegicus]                                                                                             | - | - | + | - | - |
| 109509443 | CXXC finger 6 [Rattus norvegicus]                                                                                                                                       | - | - | + | - | - |
| 109509455 | PREDICTED: hypothetical protein [Rattus norvegicus]                                                                                                                     | - | - | - | + | - |
| 109509488 | golgi associated PDZ and coiled-coil motif containing [Rattus norvegicus]                                                                                               | - | - | - | + | - |
| 109510643 | WW, C2 and coiled-coil domain containing 1 [Rattus norvegicus]                                                                                                          | - | - | + | - | - |
| 109510822 | DNA polymerase alpha catalytic subunit [Rattus norvegicus]                                                                                                              | - | - | - | + | - |
| 109510913 | Zinc finger MYM-type protein 3 (Zinc finger protein 261) (DXHXS6673E protein) [Rattus norvegicus]                                                                       | - | - | - | + | - |
| 109511369 | High mobility group protein 4 (HMG-4) (High mobility group protein 2a) (HMG-2a) [Rattus norvegicus]                                                                     | - | - | - | - | + |
| 109512351 | transcription elongation factor A (SII)-like 5 [Rattus norvegicus]                                                                                                      | - | - | - | + | - |
| 109512416 | procollagen, type IV, alpha 6 [Rattus norvegicus]                                                                                                                       | - | - | - | - | + |
| 111185722 | Krt78 protein [Mus musculus]                                                                                                                                            | - | - | - | - | + |
| 114145515 | protein kinase N3 [Rattus norvegicus]                                                                                                                                   | - | - | + | + | - |
| 116063546 | procollagen, type XXVII, alpha 1 [Mus musculus]                                                                                                                         | - | + | - | - | - |
| 116292744 | ATP-binding cassette transporter [Mus musculus]                                                                                                                         | - | - | - | - | + |
| 116831677 | DICER [Cricetulus griseus]                                                                                                                                              | + | - | - | - | - |
| 118572627 | Coiled-coil domain-containing protein 11                                                                                                                                | - | + | - | - | - |

|           |                                                                                                                                                     |   |   |   |   |   |
|-----------|-----------------------------------------------------------------------------------------------------------------------------------------------------|---|---|---|---|---|
| 118582271 | splicing factor, arginine/serine-rich 1 isoform 2 [Mus musculus]                                                                                    | - | - | + | - | - |
| 118595720 | Centrosomal protein Cep290 (Nephrocystin-6)                                                                                                         | - | - | - | + | - |
| 123123542 | sodium channel voltage-gated type III alpha [Mus musculus]                                                                                          | + | - | - | - | - |
| 123225251 | novel protein [Mus musculus]                                                                                                                        | - | + | - | - | - |
| 123232121 | formin-like 2 [Mus musculus]                                                                                                                        | - | - | + | - | - |
| 123232325 | nebulin [Mus musculus]                                                                                                                              | + | + | + | + | + |
| 123232571 | titin [Mus musculus]                                                                                                                                | + | + | + | + | + |
| 123232789 | novel protein (possible orthologue of human peroxisomal proliferator-activated receptor A interacti                                                 | - | + | - | - | - |
| 123233561 | orthologue of H. sapiens chromosome 20 open reading frame 160 (C20orf160) [Mus musculus]                                                            | - | - | - | + | - |
| 123244271 | microtubule-actin crosslinking factor 1 [Mus musculus]                                                                                              | - | + | - | + | - |
| 123264882 | novel protein containing a zinc finger C3HC4 type (RING finger) domain (D11Erttd759e: DNA segment, Chr 11, ERATO Doi 759, expressed) [Mus musculus] | - | - | + | - | - |
| 124015169 | M-phase phosphoprotein 1 (MPP1) (Kinesin-related motor interacting with PIN1) (Kinesin family member 20B)                                           | - | - | - | + | - |
| 125347767 | hypothetical protein LOC229003 [Mus musculus]                                                                                                       | - | + | - | - | - |
| 125661048 | A kinase (PRKA) anchor protein (yotiao) 9 [Mus musculus]                                                                                            | - | - | - | + | - |
| 126157504 | serine/arginine repetitive matrix 2 [Mus musculus]                                                                                                  | - | - | + | - | - |
| 133922596 | baculoviral IAP repeat-containing 6 [Mus musculus]                                                                                                  | + | - | - | - | - |
